# Supplementary material for: Charging toward sustainability: MgCl 2 doped chitosan–dextran polyblend electrolytes for energy storage device applications
Source: Royal Society of Chemistry journal article supplement (doi:10.1039/d4ra06365a), 2024-01-01
Supplement: d4ra06365a1.pdf [file d4ra06365a1.pdf]

## Supporting information

### **Charging Toward Sustainability: MgCl<sub>2</sub> doped Chitosan-Dextran Polyblend Electrolytes for Energy Storage Device Applications**

Pradeep Nayak<sup>a</sup>, Ismayil<sup>a\*</sup>, Y. N. Sudhakar<sup>b</sup>, Supriya K. Shetty<sup>a</sup>

<sup>a</sup>Department of Physics, Manipal Institute of Technology, Manipal Academy of Higher Education, Manipal 576104, Karnataka, India

<sup>b</sup>Department of Chemistry, Manipal Institute of Technology, Manipal Academy of Higher Education, Manipal 576104, Karnataka, India

\*Corresponding Author e-mail: ismayil.mit@manipal.edu, ismayil.486@gmail.com

Tel: +91 98454 97546

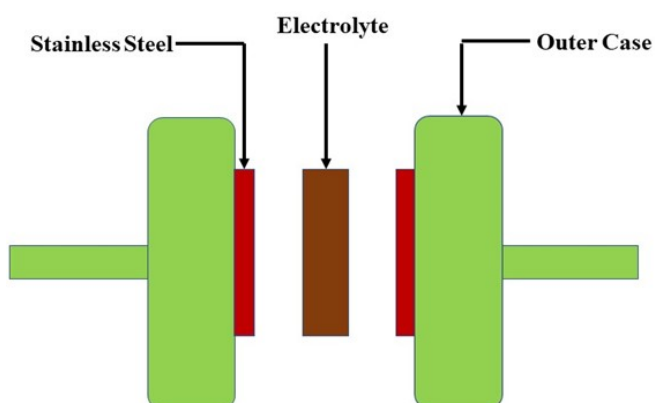

Figure S1. Standard cell arrangement utilized for conducting I-V and I-T investigations

Table 1S: FTIR peak positions for all the prepared SBPE.

| FTIR peak Assignment | Wavenumber (cm <sup>-1</sup> ) |      |       |       |       |       |       |
|----------------------|--------------------------------|------|-------|-------|-------|-------|-------|
|                      | CDC0                           | CDC5 | CDC10 | CDC15 | CDC20 | CDC25 | CDC30 |
| -OH Stretching       | 3277                           | 3267 | 3266  | 3257  | 3247  | 3266  | 3266  |
| C-H Stretching       | 2920                           | 2919 | 2918  | 2917  | 2918  | 2917  | 2917  |
| -NH Bending          | 1551                           | 1547 | 1549  | 1550  | 1549  | 1548  | 1530  |
| C-H Bending          | 1410                           | 1410 | 1412  | 1412  | 1413  | 1415  | 1414  |
| C-O Bands            | 1012                           | 1010 | 1008  | 1009  | 1011  | 1013  | 1012  |

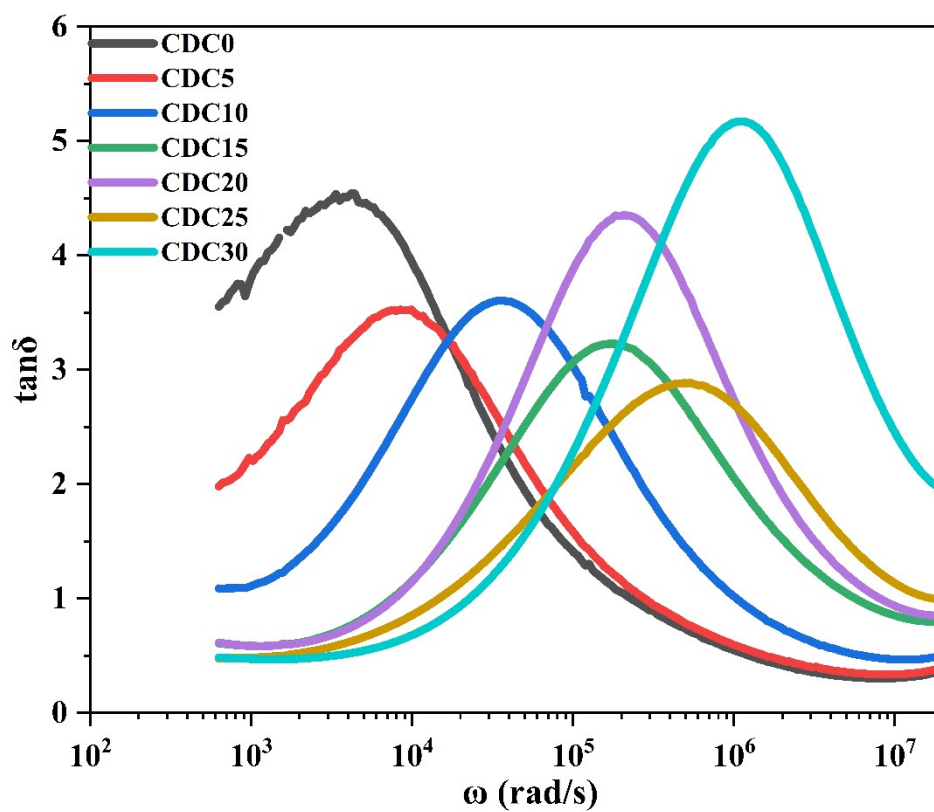

Figure S2. Tangent delta plot for the prepared polymer electrolyte samples.

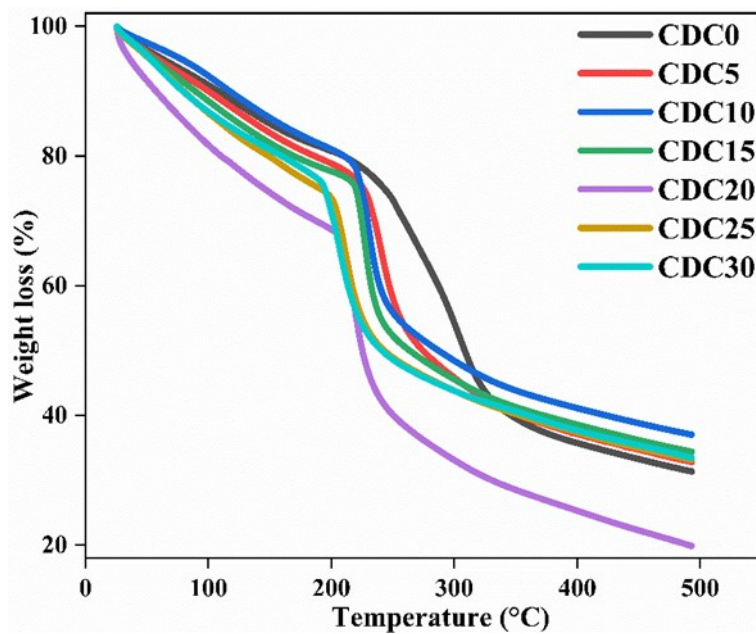

Figure S3. TG thermogram for CS+MC with different concentrations of  $MgCl_2$

Table 2S: Parameters of the cell

| <b>Cell parameters</b>                  | <b>Cell 1</b> | <b>Cell 2</b> |
|-----------------------------------------|---------------|---------------|
| Cell area (cm <sup>2</sup> )            | 1.23          | 1.23          |
| Weight of the cell (g)                  | 1.11          | 1.02          |
| Effective diameter of the cell (cm)     | 1.30          | 1.30          |
| Thickness of the cell(cm)               | 0.44          | 0.44          |
| Open circuit voltage (V)                | 1.94          | 1.90          |
| Current drawn (mA)                      | 1.6           | 1.9           |
| Current density (mAcm <sup>-2</sup> )   | 1.30          | 1.54          |
| Discharge time plateau region (h)       | 20            | 19            |
| Discharge capacity (mAh <sup>-1</sup> ) | 0.08          | 0.1           |
| Energy density (Whkg <sup>-1</sup> )    | 56            | 67            |
| Power density (Wkg <sup>-1</sup> )      | 3             | 4             |
